# Supplementary material for: The synergy of the XPO1 inhibitors combined with the BET inhibitor INCB057643 in high-grade B-cell lymphoma via downregulation of MYC expression
Source: PubMed Central journal article supplement (PMC10613613; doi:10.1038/s41598-023-45721-z), 2023-10-29

Protein bands for OCI-LY19 cell line

- MYC, CHK1, p-CHK1, Rad51

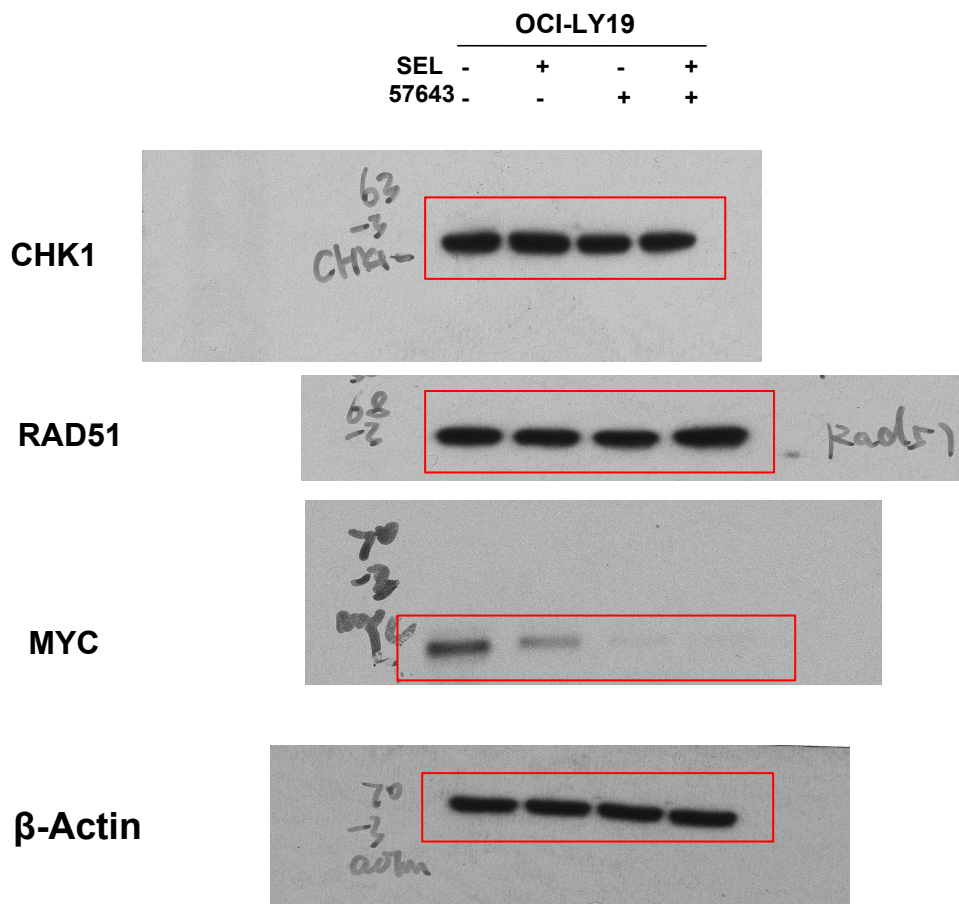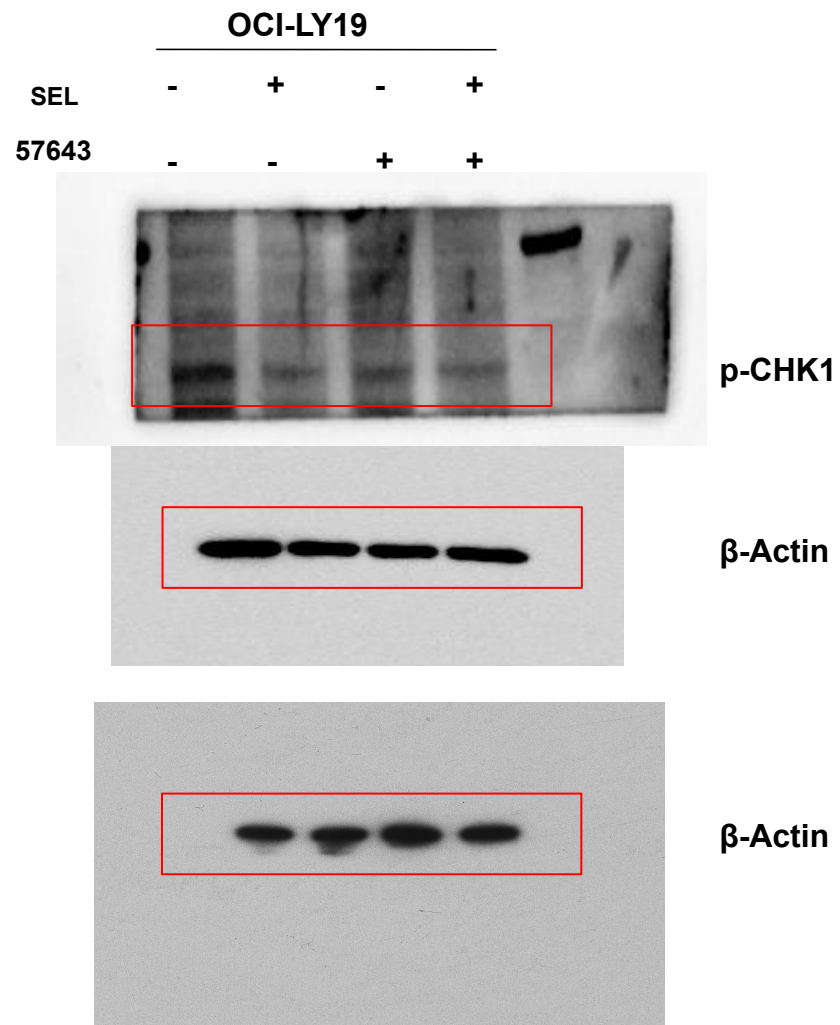

- **CHK2, p-CHK2, r-H2AX**

|       | OCI-LY19 |   |   |   |
|-------|----------|---|---|---|
| SEL   | -        | + | - | + |
| 57643 | -        | - | + | + |

|       | OCI-LY19 |   |   |   |
|-------|----------|---|---|---|
| SEL   | -        | + | - | + |
| 57643 | -        | - | + | + |

p-CHK2

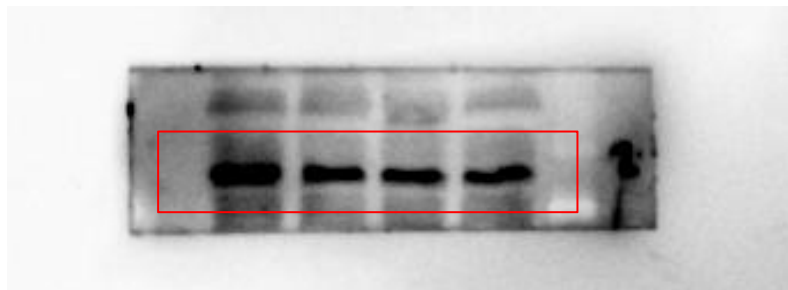

$\beta$ -Actin

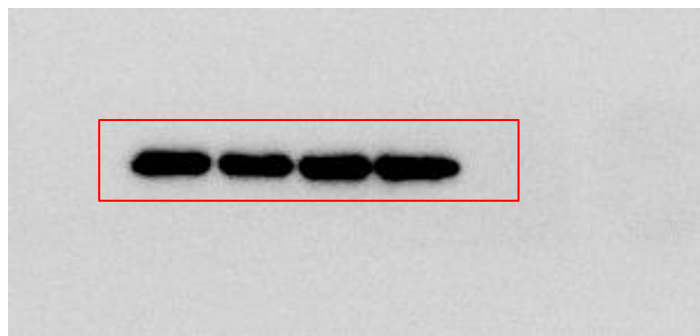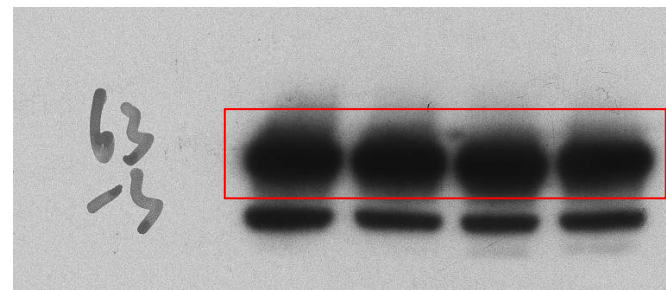

CHK2

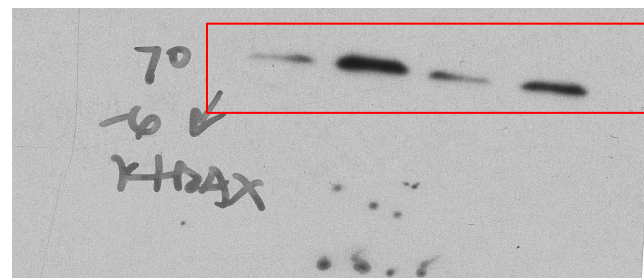

r-H2AX

- p-ATM, p-ATR, p-WEE1
- ATR, WEE1

|       | OCI-LY19 |   |   |   |
|-------|----------|---|---|---|
| SEL   | -        | + | - | + |
| 57643 | -        | - | + | + |

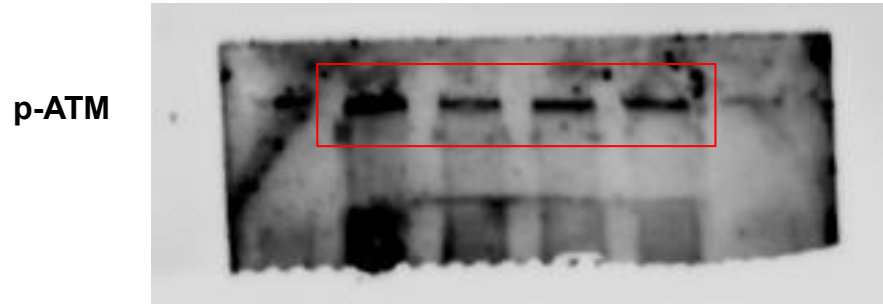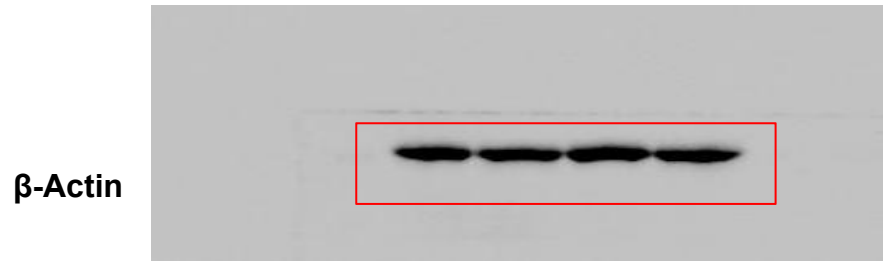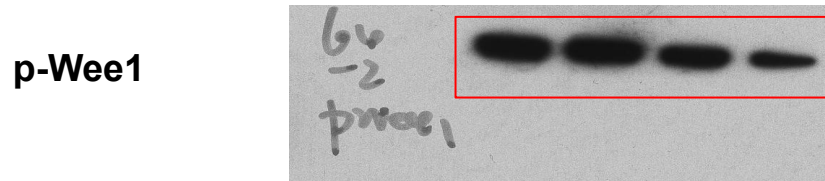

|       | OCI-LY19 |   |   |   |
|-------|----------|---|---|---|
| SEL   | -        | + | - | + |
| 57643 | -        | - | + | + |

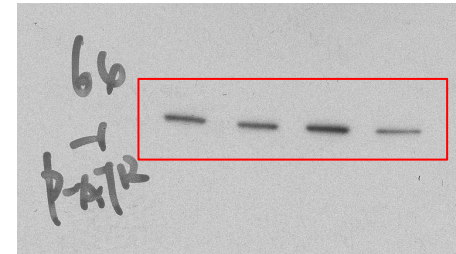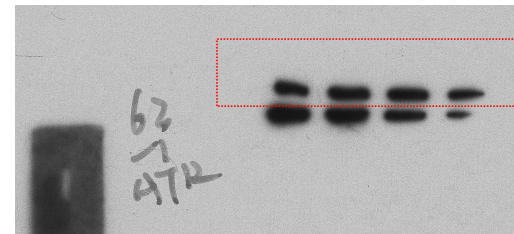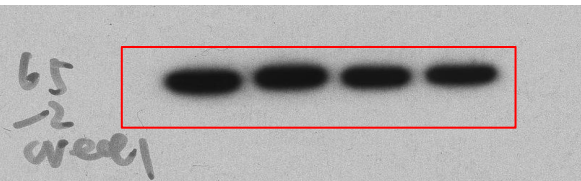

- P53, MDM2, P21, NOXA, PUMA
- BCL-XL, BIM, BCL2, MCL1, Survivin

| OCI-LY19 |   |   |   |   |
|----------|---|---|---|---|
| SEL      | - | + | - | + |
| 57643    | - | - | + | + |

| OCI-LY19 |   |   |   |   |
|----------|---|---|---|---|
| SEL      | - | + | - | + |
| 57643    | - | - | + | + |

P53

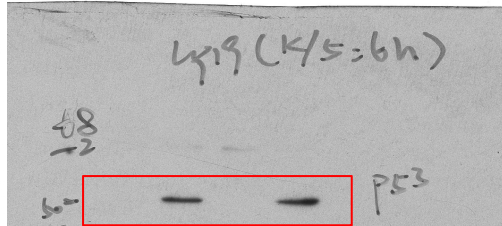

MDM2

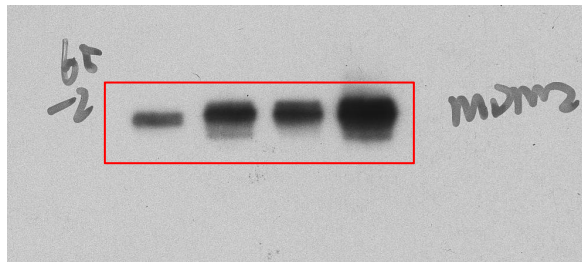

P21

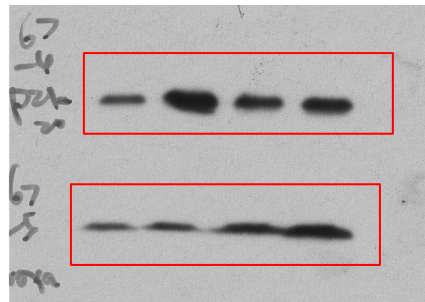

NOXA

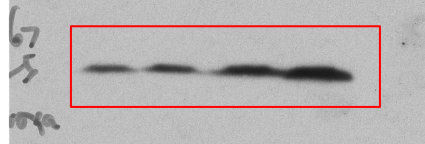

PUMA

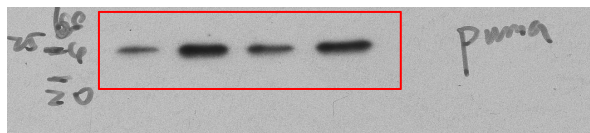

β-Actin

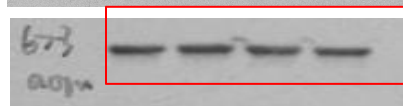

Bcl-XL

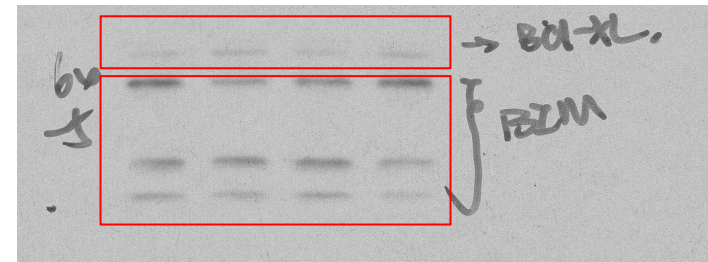

BIM

Bcl2

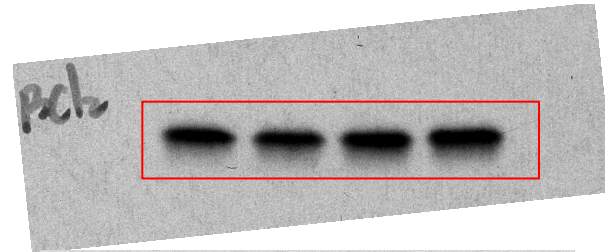

Survivin

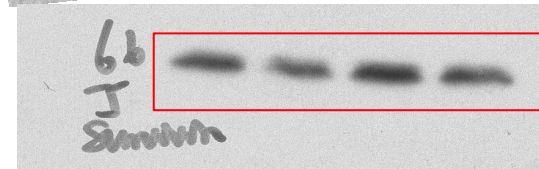

MCL1

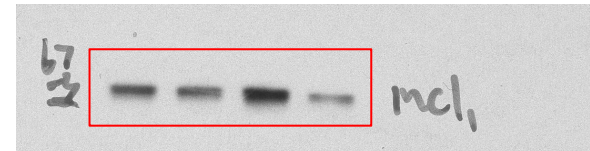

BAX

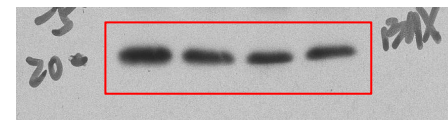

β-Actin

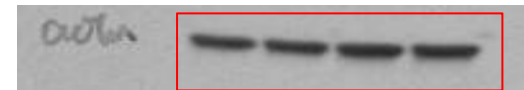

β-Actin

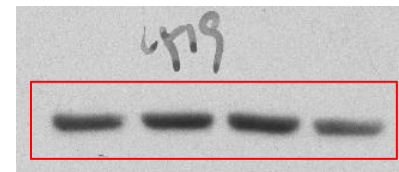

**Protein bands for TMD8 cell line**

- ATM, ATR, WEE1, CHK1, CHK2
- p-ATM, p-ATR, p-WEE1, p-CHK1, p-CHK2, r-H2AX, Rad 51

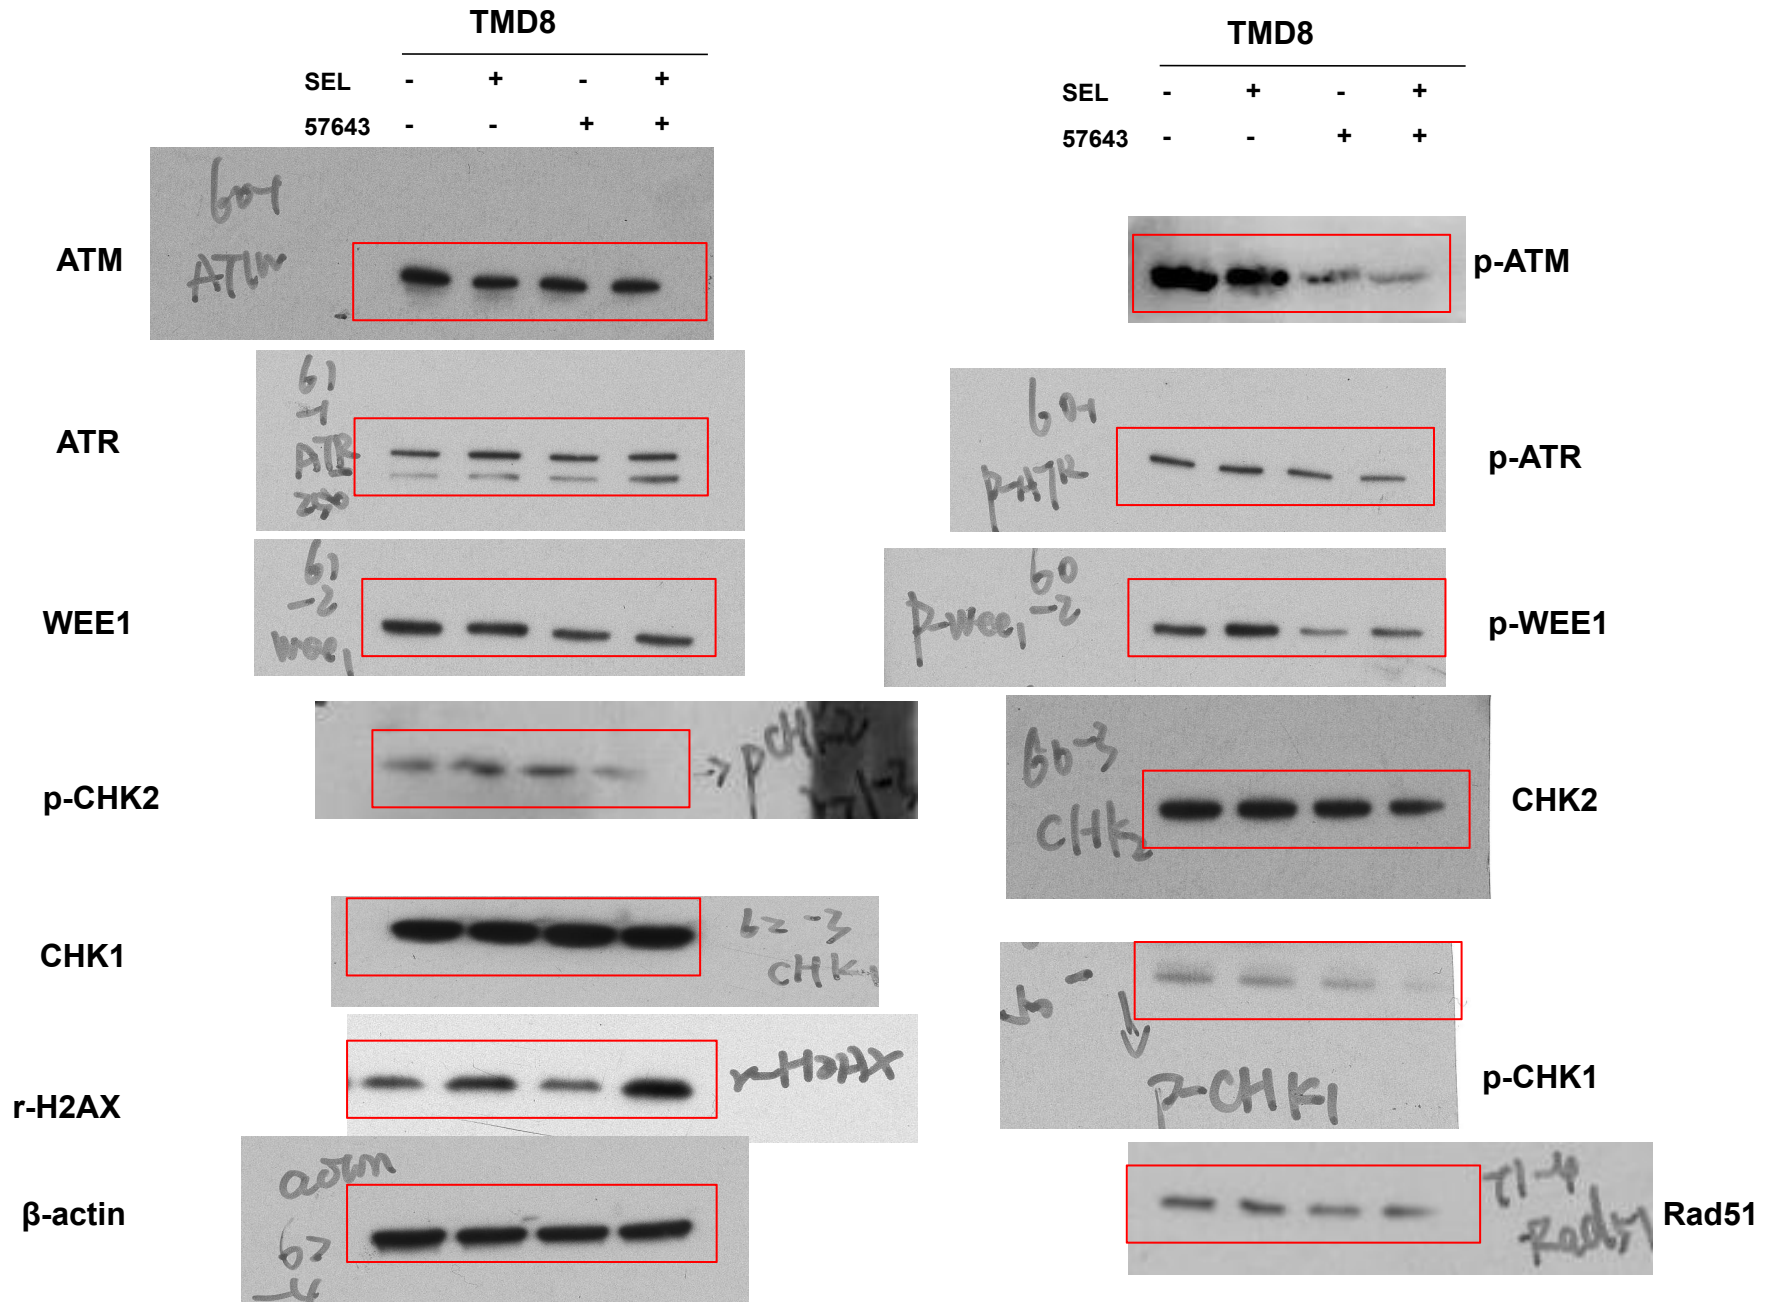

- MYC, P53, P73, NOXA, PUMA, BAX, BCL2
- BIM, BAK, MCL1, Survivin, BCL-XL

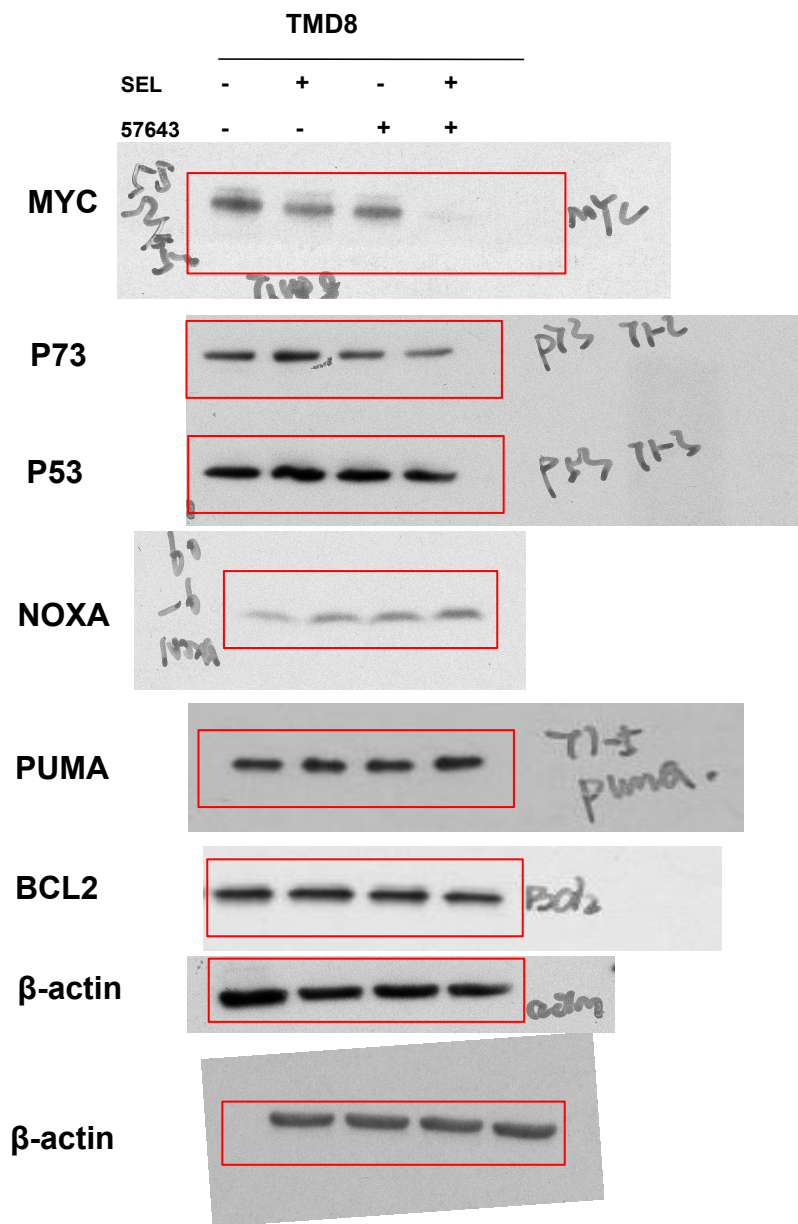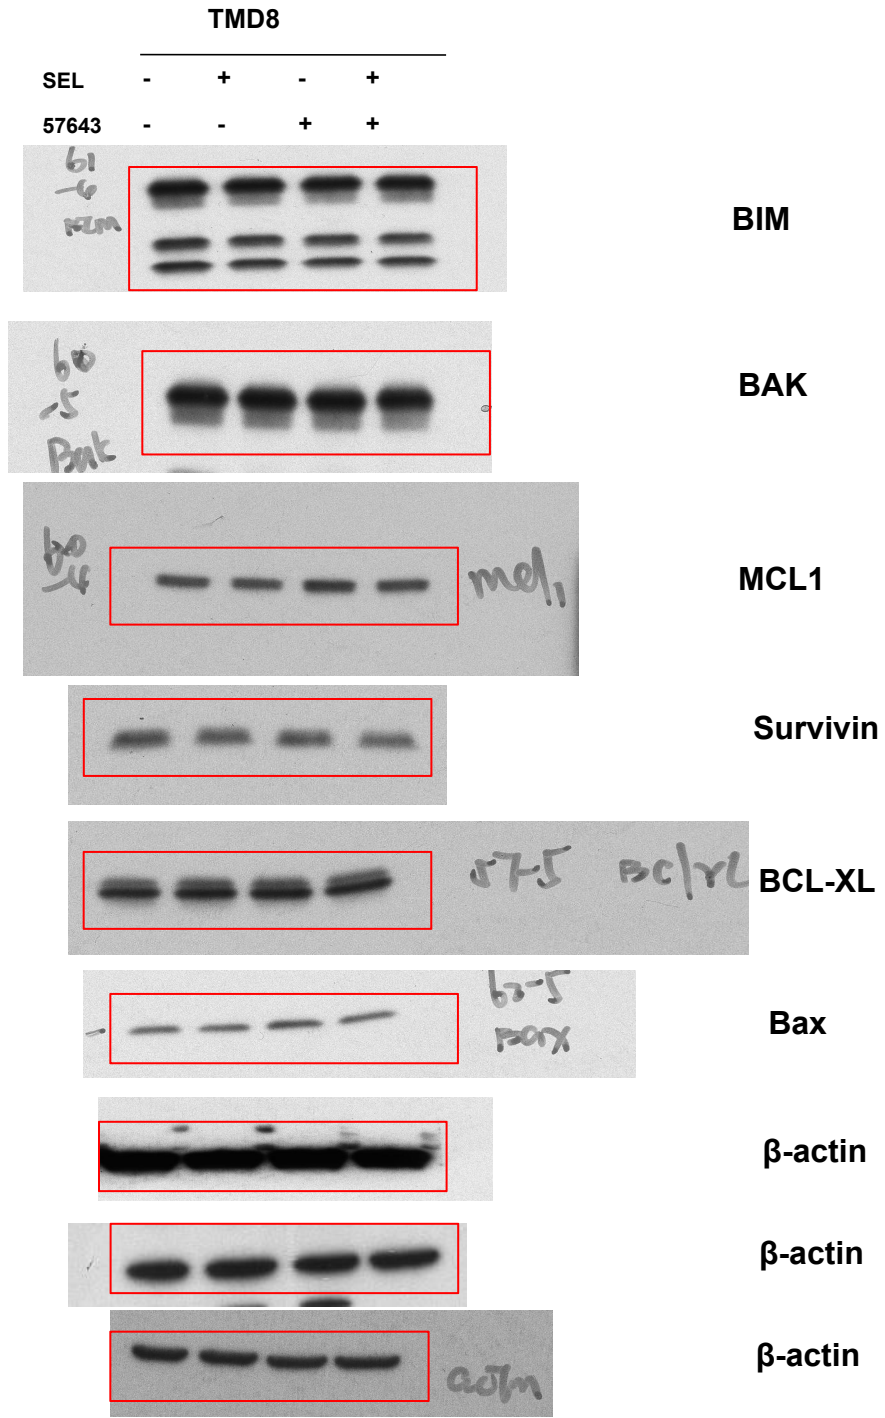

Supplement: 41598_2023_45721_MOESM2_ESM.pdf [file 41598_2023_45721_MOESM2_ESM.pdf]
